# Supplementary material for: Escape From the Heat: Thermal Stratification in a Well-Mixed Estuary and Implications for Fish Species Facing a Changing Climate
Source: Preprints.org preprint supplement (doi:10.20944/preprints202111.0401.v1), 2021-11-22
Supplement: Supplementary file 1 [file supplementary]

(listing pending)
